# Supplementary material
Source: Research Square preprint supplement (doi:10.21203/rs.3.rs-8726245/v1)
Supplement: Supplementary file 1 [file 8ccbcac3a05e183d89f859cb.docx]

Table 1.Baseline Clinical Characteristics of the Patients

| **Variable**  **Levels** | | **Overall（N = 9,665）** | **Q1（N = 2,412）** | **Q2（N = 2,417）** | **Q3（N = 2,418）** | **Q4（N = 2,418）** | **p-value** |
| --- | --- | --- | --- | --- | --- | --- | --- |
| Basic Information | | | | | | | |
| Age |  | 66.07 (18.00 - 102.00) | 64.86 (19.00 - 102.00) | 65.64 (18.00 - 100.00) | 65.94 (19.00 - 100.00) | 67.83 (18.00 - 99.00) | <0.001 |
| Gender |  |  |  |  |  |  | 0.054 |
|  | female | 3,980.00 (41.18%) | 972.00 (40.30%) | 953.00 (39.43%) | 1,017.00 (42.06%) | 1,038.00 (42.93%) |  |
|  | male | 5,685.00 (58.82%) | 1,440.00 (59.70%) | 1,464.00 (60.57%) | 1,401.00 (57.94%) | 1,380.00 (57.07%) |  |
| BMI |  | 28.97 (0.34 - 192.18) | 28.64 (0.34 - 192.18) | 28.97 (0.34 - 93.30) | 29.18 (0.64 - 95.14) | 29.08 (10.63 - 108.69) | 0.399 |
| Race |  | 9665 |  |  |  |  | <0.001 |
|  | White | 5887 (60.91%) | 1519 (62.97%) | 1423 (58.87%) | 1456 (60.21%) | 1489 (61.57%) |  |
|  | Black | 964 (9.97%) | 236 (9.78%) | 263 (10.88%) | 254 (10.50%) | 211 (8.72%) |  |
|  | Hispanic | 353 (3.65%) | 106 (4.39%) | 98 (4.05%) | 76(3.14%) | 73 (3.01%) |  |
|  | Asian | 309 (3.19%) | 96 (3.98%) | 74 (3.06%) | 72 (2.97%) | 67 (2.77%) |  |
|  | Others | 2152(22.26%) | 455 (18.86%) | 559(23.12%) | 560(23.15%) | 578 (23.90%) |  |
| Score | | | | | | | |
| SOFA score |  | 6.46 (0.00 - 23.00) | 6.79 (0.00 - 23.00) | 6.36 (0.00 - 22.00) | 6.12 (0.00 - 22.00) | 6.58 (0.00 - 22.00) | <0.001 |
| APSIII score |  | 51.44 (7.00 - 184.00) | 48.64 (10.00 - 184.00) | 49.18 (8.00 - 171.00) | 51.02 (7.00 - 144.00) | 56.91 (11.00 - 166.00) | <0.001 |
| SIRS score |  | 2.76 (0.00 - 4.00) | 2.66 (0.00 - 4.00) | 2.64 (0.00 - 4.00) | 2.78 (0.00 - 4.00) | 2.95 (0.00 - 4.00) | <0.001 |
| SAPSII score |  | 40.67 (6.00 - 114.00) | 38.74 (6.00 - 98.00) | 39.32 (6.00 - 94.00) | 40.38 (6.00 - 101.00) | 44.22 (8.00 - 114.00) | <0.001 |
| OASIS score |  | 33.76 (9.00 - 72.00) | 31.95 (10.00 - 62.00) | 33.34 (11.00 - 62.00) | 34.24 (10.00 - 67.00) | 35.51 (9.00 - 72.00) | <0.001 |
| GCS score |  | 13.38 (3.00 - 15.00) | 13.48 (3.00 - 15.00) | 13.35 (3.00 - 15.00) | 13.34 (3.00 - 15.00) | 13.36 (3.00 - 15.00) | 0.050 |
| Charlson score |  | 5.49 (0.00 - 18.00) | 5.19 (0.00 - 17.00) | 5.21 (0.00 - 18.00) | 5.55 (0.00 - 18.00) | 5.99 (0.00 - 17.00) | <0.001 |
| PESI score |  | 122.68 (32.00 - 257.00) | 119.00 (32.00 - 230.00) | 121.76 (35.00 - 241.00) | 122.21 (44.00 - 230.00) | 127.73 (39.00 - 257.00) | <0.001 |
| sPESI score |  | 1.97 (0.00 - 6.00) | 1.76 (0.00 - 5.00) | 1.93 (0.00 - 5.00) | 1.99 (0.00 - 6.00) | 2.18 (0.00 - 6.00) | <0.001 |
| ShockIndex score |  | 1.31 (0.28 - 532.47) | 1.21 (0.28 - 54.46) | 1.26 (0.28 - 54.46) | 1.47 (0.31 - 532.47) | 1.31 (0.35 - 13.67) | <0.001 |
| PATHOS score |  | 2.25 (0.00 - 5.00) | 2.01 (0.00 - 5.00) | 2.20 (0.00 - 5.00) | 2.29 (0.00 - 5.00) | 2.49 (0.00 - 5.00) | <0.001 |
| Basic vital signs | | | | | | | |
| Heart rate （bpm） |  | 91.41 (0.00 - 230.00) | 88.57 (32.00 - 179.00) | 89.88 (0.00 - 186.00) | 92.44 (0.00 - 230.00) | 94.74 (0.00 - 191.00) | <0.001 |
| Temperature（℉） |  | 98.26 (0.00 - 104.90) | 98.21 (33.30 - 104.40) | 98.30 (35.60 - 103.30) | 98.32 (34.10 - 104.00) | 98.21 (0.00 - 104.90) | 0.001 |
| Respiratory rate (breaths/min) |  | 20.32 (0.00 - 87.00) | 19.12 (0.00 - 61.00) | 19.93 (0.00 - 64.00) | 20.68 (0.00 - 87.00) | 21.55 (0.00 - 63.00) | <0.001 |
| Spo2（%） |  | 97.75 (9.00 - 9,819.00) | 97.81 (68.00 - 963.00) | 96.78 (55.00 - 100.00) | 100.48 (19.00 - 9,819.00) | 95.93 (9.00 - 100.00) | <0.001 |
| Lab metrics | | | | | | | |
| Lymphocytes (K/μL) |  | 1.46 (0.01 - 325.69) | 2.12 (0.01 - 325.69) | 1.49 (0.01 - 28.34) | 1.26 (0.02 - 24.03) | 0.97 (0.03 - 8.80) | <0.001 |
| RDW（%） |  | 15.40 (11.10 - 34.40) | 15.22 (11.10 - 34.40) | 15.20 (11.40 - 28.50) | 15.37 (11.30 - 29.60) | 15.81 (11.10 - 33.10) | <0.001 |
| Hematocrit (%) （%） |  | 31.66 (10.50 - 66.40) | 29.26 (12.80 - 60.40) | 31.77 (13.00 - 54.60) | 32.97 (13.00 - 60.70) | 32.64 (10.50 - 66.40) | <0.001 |
| Hemoglobin（g/dL） |  | 10.23 (3.30 - 21.00) | 9.54 (3.80 - 19.10) | 10.32 (4.00 - 17.40) | 10.62 (4.20 - 19.00) | 10.46 (3.30 - 21.00) | <0.001 |
| Platelets （K/uL） |  | 191.54 (5.00 - 1,647.00) | 115.17 (5.00 - 562.00) | 168.90 (17.00 - 1,647.00) | 209.12 (12.00 - 764.00) | 272.77 (16.00 - 1,254.00) | <0.001 |
| RBC （m/uL） |  | 3.46 (1.13 - 7.21) | 3.17 (1.25 - 6.64) | 3.47 (1.27 - 6.26) | 3.61 (1.33 - 7.21) | 3.59 (1.13 - 6.95) | <0.001 |
| WBC（K/uL） |  | 13.98 (0.10 - 328.40) | 9.51 (0.10 - 328.40) | 12.14 (1.00 - 156.40) | 14.37 (0.60 - 139.00) | 19.87 (2.00 - 96.50) | <0.001 |
| Neutrophils（K/uL） |  | 11.01 (0.01 - 77.41) | 5.55 (0.01 - 40.81) | 8.86 (0.81 - 47.30) | 11.56 (1.26 - 63.43) | 18.03 (3.51 - 77.41) | <0.001 |
| Monocytes （K/uL） |  | 0.86 (0.01 - 49.22) | 0.40 (0.01 - 19.65) | 0.68 (0.04 - 20.33) | 0.94 (0.04 - 7.68) | 1.42 (0.12 - 49.22) | <0.001 |
| MLR |  | 0.96 (0.01 - 25.50) | 0.37 (0.01 - 17.29) | 0.60 (0.04 - 10.20) | 0.94 (0.12 - 11.26) | 1.92 (0.23 - 25.50) | <0.001 |
| NLR |  | 14.29 (0.01 - 419.50) | 5.37 (0.01 - 102.33) | 9.09 (1.00 - 100.83) | 13.74 (2.03 - 419.50) | 28.94 (2.50 - 278.00) | <0.001 |
| PLR |  | 256.92 (0.35 - 12,000.00) | 142.90 (0.35 - 4,000.00) | 185.69 (2.08 - 8,700.00) | 251.80 (8.65 - 12,000.00) | 446.97 (5.52 - 5,200.00) | <0.001 |
| lnPIV |  | 6.78 (1.69) | 4.60 (1.30) | 6.38 (0.31) | 7.39 (0.28) | 8.73 (0.68) | <0.001 |
| Anion gap(mEq/L) |  | 14.96 (-2.00 - 55.00) | 13.94 (2.00 - 47.00) | 14.51 (-2.00 - 55.00) | 15.12 (1.00 - 48.00) | 16.26 (3.00 - 47.00) | <0.001 |
| Calcium(mg/dL) |  | 8.29 (1.50 - 14.50) | 8.22 (1.70 - 13.70) | 8.28 (1.50 - 14.50) | 8.35 (3.90 - 14.20) | 8.32 (4.60 - 12.50) | <0.001 |
| Chloride (mEq/L) |  | 102.95 (61.00 - 139.00) | 104.70 (74.00 - 139.00) | 103.53 (61.00 - 135.00) | 102.35 (69.00 - 135.00) | 101.22 (70.00 - 130.00) | <0.001 |
| Glucose(mg/dL) |  | 153.01 (15.00 - 2,044.00) | 141.76 (21.00 - 1,246.00) | 148.14 (19.00 - 2,010.00) | 159.26 (19.00 - 1,205.00) | 162.85 (15.00 - 2,044.00) | <0.001 |
| Potassium(mEq/L) |  | 4.29 (1.70 - 9.80) | 4.20 (1.90 - 9.70) | 4.29 (1.90 - 9.80) | 4.28 (2.40 - 9.50) | 4.38 (1.70 - 8.70) | <0.001 |
| Sodium(mEq/L) |  | 138.03 (101.00 - 176.00) | 138.40 (107.00 - 176.00) | 138.40 (101.00 - 170.00) | 137.96 (110.00 - 169.00) | 137.37 (106.00 - 170.00) | <0.001 |
| PT-INR |  | 1.58 (0.80 - 14.70) | 1.59 (0.90 - 14.70) | 1.54 (0.80 - 13.20) | 1.57 (0.80 - 13.80) | 1.62 (0.90 - 11.70) | <0.001 |
| PT(sec) |  | 17.27 (8.30 - 150.00) | 17.32 (9.30 - 150.00) | 16.81 (8.80 - 150.00) | 17.21 (8.30 - 150.00) | 17.73 (9.40 - 150.00) | <0.001 |
| PTT(sec) |  | 38.02 (17.80 - 150.00) | 37.27 (18.40 - 150.00) | 37.28 (18.50 - 150.00) | 37.90 (18.10 - 150.00) | 39.64 (17.80 - 150.00) | <0.001 |
| Creatinine(mg/dL) |  | 1.68 (0.00 - 32.00) | 1.49 (0.20 - 19.10) | 1.60 (0.20 - 32.00) | 1.67 (0.00 - 16.40) | 1.96 (0.20 - 23.80) | <0.001 |
| BUN(mg/dL) |  | 30.66 (1.00 - 220.00) | 25.99 (1.00 - 213.00) | 29.04 (2.00 - 216.00) | 31.48 (1.00 - 212.00) | 36.09 (2.00 - 220.00) | <0.001 |
| Lactate(mmol/L) |  | 2.49 (0.20 - 25.10) | 2.54 (0.30 - 22.00) | 2.42 (0.50 - 25.10) | 2.40 (0.20 - 20.00) | 2.59 (0.40 - 22.00) | <0.001 |
| Pco2(mmHg) |  | 43.02 (9.00 - 148.00) | 41.66 (14.00 - 115.00) | 43.05 (16.00 - 139.00) | 43.30 (10.00 - 121.00) | 44.05 (9.00 - 148.00) | <0.001 |
| Ph |  | 7.35 (6.53 - 7.78) | 7.37 (6.53 - 7.71) | 7.36 (6.85 - 7.65) | 7.35 (6.69 - 7.62) | 7.33 (6.69 - 7.78) | <0.001 |
| Po2(mmHg) |  | 127.34 (11.00 - 681.00) | 168.07 (16.00 - 630.00) | 135.72 (11.00 - 681.00) | 109.81 (14.00 - 538.00) | 95.85 (14.00 - 528.00) | <0.001 |
| Supportive Therapies | | | | | | | |
| Mechanical ventilation |  |  |  |  |  |  | 0.040 |
|  | yes | 8,289.00 (85.76%) | 2,037.00 (84.45%) | 2,060.00 (85.23%) | 2,108.00 (87.18%) | 2,084.00 (86.19%) |  |
|  | no | 1,376.00 (14.24%) | 375.00 (15.55%) | 357.00 (14.77%) | 310.00 (12.82%) | 334.00 (13.81%) |  |
| Mechanical ventilation time |  |  |  |  |  |  |  |
|  | yes | 101.98(0.10- 3,087.77) | 82.19 (0.18 - 1,347.00) | 98.09 (0.13 - 1,065.58) | 109.55 (0.10 - 3,087.77) | 117.50 (0.17 - 1,957.90) | <0.001 |
|  | no | 1,376.00 (14.24%) | 375.00 (15.55%) | 357.00 (14.77%) | 310.00 (12.82%) | 334.00 (13.81%) |  |
| Vasoactive agent |  |  |  |  |  |  | <0.001 |
|  | yes | 6,819.00 (70.55%) | 1,722.00 (71.39%) | 1,708.00 (70.67%) | 1,616.00 (66.83%) | 1,773.00 (73.33%) |  |
|  | no | 2,846.00 (29.45%) | 690.00 (28.61%) | 709.00 (29.33%) | 802.00 (33.17%) | 645.00 (26.67%) |  |
| CRRT |  |  |  |  |  |  | <0.001 |
|  | yes | 1,017.00 (10.52%) | 218.00 (9.04%) | 211.00 (8.73%) | 247.00 (10.22%) | 341.00 (14.10%) |  |
|  | no | 8,648.00 (89.48%) | 2,194.00 (90.96%) | 2,206.00 (91.27%) | 2,171.00 (89.78%) | 2,077.00 (85.90%) |  |
| CRRT time |  |  |  |  |  |  |  |
|  | yes | 8.03 (1.00 - 53.00) | 7.55 (1.00 - 48.00) | 7.68 (1.00 - 53.00) | 8.49 (1.00 - 42.00) | 8.22 (1.00 - 47.00) | 0.215 |
|  | no | 8,648.00 (89.48%) | 2,194.00 (90.96%) | 2,206.00 (91.27%) | 2,171.00 (89.78%) | 2,077.00 (85.90%) |  |
| Comorbidities | | | | | | | |
| Hypertension |  |  |  |  |  |  | <0.001 |
|  | yes | 3,360.00 (34.76%) | 936.00 (38.81%) | 854.00 (35.33%) | 840.00 (34.74%) | 730.00 (30.19%) |  |
|  | no | 6,305.00 (65.24%) | 1,476.00 (61.19%) | 1,563.00 (64.67%) | 1,578.00 (65.26%) | 1,688.00 (69.81%) |  |
| Acute renal failure |  |  |  |  |  |  | <0.001 |
|  | yes | 5,064.00 (52.40%) | 1,033.00 (42.83%) | 1,197.00 (49.52%) | 1,345.00 (55.62%) | 1,489.00 (61.58%) |  |
|  | no | 4,601.00 (47.60%) | 1,379.00 (57.17%) | 1,220.00 (50.48%) | 1,073.00 (44.38%) | 929.00 (38.42%) |  |
| Liver cirrhosis |  |  |  |  |  |  | <0.001 |
|  | yes | 1,019.00 (10.54%) | 339.00 (14.05%) | 263.00 (10.88%) | 217.00 (8.97%) | 200.00 (8.27%) |  |
|  | no | 8,646.00 (89.46%) | 2,073.00 (85.95%) | 2,154.00 (89.12%) | 2,201.00 (91.03%) | 2,218.00 (91.73%) |  |
| Hepatitis |  |  |  |  |  |  | <0.001 |
|  | yes | 839.00 (8.68%) | 268.00 (11.11%) | 212.00 (8.77%) | 181.00 (7.49%) | 178.00 (7.36%) |  |
|  | no | 8,826.00 (91.32%) | 2,144.00 (88.89%) | 2,205.00 (91.23%) | 2,237.00 (92.51%) | 2,240.00 (92.64%) |  |
| Stroke |  |  |  |  |  |  | 0.896 |
|  | yes | 703.00 (7.27%) | 169.00 (7.01%) | 182.00 (7.53%) | 179.00 (7.40%) | 173.00 (7.15%) |  |
|  | no | 8,962.00 (92.73%) | 2,243.00 (92.99%) | 2,235.00 (92.47%) | 2,239.00 (92.60%) | 2,245.00 (92.85%) |  |
| Chronic kidney disease |  |  |  |  |  |  | <0.001 |
|  | yes | 2,320.00 (24.00%) | 484.00 (20.07%) | 548.00 (22.67%) | 578.00 (23.90%) | 710.00 (29.36%) |  |
|  | no | 7,345.00 (76.00%) | 1,928.00 (79.93%) | 1,869.00 (77.33%) | 1,840.00 (76.10%) | 1,708.00 (70.64%) |  |
| Type 2 diabetes |  |  |  |  |  |  | 0.031 |
|  | yes | 2,995.00 (30.99%) | 713.00 (29.56%) | 721.00 (29.83%) | 762.00 (31.51%) | 799.00 (33.04%) |  |
|  | no | 6,670.00 (69.01%) | 1,699.00 (70.44%) | 1,696.00 (70.17%) | 1,656.00 (68.49%) | 1,619.00 (66.96%) |  |
| Type 1 diabetes |  |  |  |  |  |  | 0.003 |
|  | yes | 162.00 (1.68%) | 33.00 (1.37%) | 25.00 (1.03%) | 52.00 (2.15%) | 52.00 (2.15%) |  |
|  | no | 9,503.00 (98.32%) | 2,379.00 (98.63%) | 2,392.00 (98.97%) | 2,366.00 (97.85%) | 2,366.00 (97.85%) |  |
| Hyperlipemia |  |  |  |  |  |  | 0.463 |
|  | yes | 3,966.00 (41.03%) | 1,006.00 (41.71%) | 1,008.00 (41.70%) | 991.00 (40.98%) | 961.00 (39.74%) |  |
|  | no | 5,699.00 (58.97%) | 1,406.00 (58.29%) | 1,409.00 (58.30%) | 1,427.00 (59.02%) | 1,457.00 (60.26%) |  |
| Heart failure |  |  |  |  |  |  | <0.001 |
|  | yes | 3,082.00 (31.89%) | 594.00 (24.63%) | 738.00 (30.53%) | 814.00 (33.66%) | 936.00 (38.71%) |  |
|  | no | 6,583.00 (68.11%) | 1,818.00 (75.37%) | 1,679.00 (69.47%) | 1,604.00 (66.34%) | 1,482.00 (61.29%) |  |
| Coronary atherosclerotic heart disease |  |  |  |  |  |  | 0.101 |
|  | yes | 3,716.00 (38.45%) | 944.00 (39.14%) | 947.00 (39.18%) | 878.00 (36.31%) | 947.00 (39.16%) |  |
|  | no | 5,949.00 (61.55%) | 1,468.00 (60.86%) | 1,470.00 (60.82%) | 1,540.00 (63.69%) | 1,471.00 (60.84%) |  |
| Ending | | | | | | | |
| 28-day mortality |  | 1,987.00 (20.56%) | 401.00 (16.63%) | 405.00 (16.76%) | 487.00 (20.14%) | 694.00 (28.70%) | <0.001 |
| 90-day mortality |  | 2,270.00 (23.49%) | 449.00 (18.62%) | 482.00 (19.94%) | 559.00 (23.12%) | 780.00 (32.26%) | <0.001 |
| Total mortality |  | 4,314.00 (44.64%) | 925.00 (38.35%) | 946.00 (39.14%) | 1,087.00 (44.95%) | 1,356.00 (56.08%) | <0.001 |

Table 2 Results of COX regression analysis

| **Variable** | **Count** | | | **Percent** | | **HR** | | **Lower** | | **Upper** | **P-value** | |
| --- | --- | --- | --- | --- | --- | --- | --- | --- | --- | --- | --- | --- |
| 28-day mortality | | | | | | | | | | | | |
| model 1 | | | | | | | | | | | | |
| Overall | 9665 | | | 100 | | 1.14 | | 1.11 | | 1.17 | <0.001 | |
| Group |  | | |  | |  | |  | |  |  | |
| 1 | 2412 | | | 25 | | 0.85 | | 0.8 | | 0.9 | <0.001 | |
| 2 | 2417 | | | 25 | | 1.32 | | 0.97 | | 1.8 | 0.081 | |
| 3 | 2418 | | | 25 | | 2.29 | | 1.67 | | 3.14 | <0.001 | |
| 4 | 2418 | | | 25 | | 1.27 | | 1.15 | | 1.41 | <0.001 | |
| model 2 | | | | | | | | | | | | |
| Overall | 9665 | | | 100 | | 1.12 | | 1.09 | | 1.16 | <0.001 | |
| Group |  | | |  | |  | |  | |  |  | |
| 1 | 2412 | | | 25 | | 0.84 | | 0.8 | | 0.89 | <0.001 | |
| 2 | 2417 | | | 25 | | 1.27 | | 0.93 | | 1.74 | 0.138 | |
| 3 | 2418 | | | 25 | | 2.3 | | 1.67 | | 3.18 | <0.001 | |
| 4 | 2418 | | | 25 | | 1.27 | | 1.15 | | 1.41 | <0.001 | |
| model 3 | | | | | | | | | | | | |
| Overall | 9665 | | | 100 | | 0.97 | | 0.93 | | 1.02 | 0.228 | |
| Group |  | | |  | |  | |  | |  |  | |
| 1 | 2412 | | | 25 | | 0.86 | | 0.79 | | 0.94 | 0.001 | |
| 2 | 2417 | | | 25 | | 0.99 | | 0.69 | | 1.41 | 0.941 | |
| 3 | 2418 | | | 25 | | 2.17 | | 1.44 | | 3.26 | <0.001 | |
| 4 | 2418 | | | 25 | | 1.32 | | 1.04 | | 1.67 | 0.024 | |
| 90-day mortality | | | | | | | | | | | | |
| model 1 | | | | | | | | | | | | | |
| Overall | | 9665 | 100 | | 1.14 | | 1.11 | | 1.17 | | | <0.001 | |
| Group | |  |  | |  | |  | |  | | |  | |
| 1 | | 2412 | 25 | | 0.83 | | 0.79 | | 0.88 | | | <0.001 | |
| 2 | | 2417 | 25 | | 1.27 | | 0.95 | | 1.68 | | | 0.106 | |
| 3 | | 2418 | 25 | | 2.34 | | 1.74 | | 3.15 | | | <0.001 | |
| 4 | | 2418 | 25 | | 1.24 | | 1.12 | | 1.36 | | | <0.001 | |
| model 2 | | | | | | | | | | | | | |
| Overall | | 9665 | 100 | | 1.12 | | 1.09 | | 1.15 | | | <0.001 | |
| Group | |  |  | |  | |  | |  | | |  | |
| 1 | | 2412 | 25 | | 0.82 | | 0.78 | | 0.87 | | | <0.001 | |
| 2 | | 2417 | 25 | | 1.23 | | 0.92 | | 1.64 | | | 0.161 | |
| 3 | | 2418 | 25 | | 2.37 | | 1.76 | | 3.2 | | | <0.001 | |
| 4 | | 2418 | 25 | | 1.24 | | 1.12 | | 1.36 | | | <0.001 | |
| model 3 | | | | | | | | | | | | | |
| Overall | | 9665 | 100 | | 0.96 | | 0.92 | | 1.01 | | | 0.105 | |
| Group | |  |  | |  | |  | |  | | |  | |
| 1 | | 2412 | 25 | | 0.84 | | 0.77 | | 0.91 | | | <0.001 | |
| 2 | | 2417 | 25 | | 0.94 | | 0.68 | | 1.3 | | | 0.719 | |
| 3 | | 2418 | 25 | | 2.09 | | 1.44 | | 3.03 | | | <0.001 | |
| 4 | | 2418 | 25 | | 1.24 | | 1 | | 1.56 | | | 0.055 | |
| Model 1 was the crude model without covariate adjustment.  Model 2 was the partially adjusted model, controlling for age, sex, and race.  Model 3 was the fully adjusted model, controlling for all covariates, including:  Demographics: age, sex, race, and BMI.  Severity scores: SOFA, APS III, SIRS, SAPS II, OASIS, GCS, Charlson, PESI, sPESI, Shock Index, and PATHOS scores.  Treatments: mechanical ventilation, renal replacement therapy, and vasopressor use.  Comorbidities: hypertension, acute renal failure, cirrhosis, hepatitis, stroke, chronic kidney disease, type 1 and type 2 diabetes, hyperlipidemia, heart failure, and coronary atherosclerotic heart disease.  Vital signs: heart rate, temperature, respiratory rate, and SpO₂.  Laboratory variables: lymphocyte count (K/µL), RDW (%), hematocrit (%), hemoglobin (g/dL), platelet count (K/µL), red blood cells (M/µL), white blood cells (K/µL), neutrophils (K/µL), monocytes (K/µL), MLR, NLR, PLR, anion gap, calcium, chloride, glucose, potassium, sodium, PT-INR, PT, PTT, creatinine, BUN, lactate, PCO₂, pH, and PO₂.。 | | | | | | | | | | | | | |

Table 3 Results of 28-day mortality risk age subgroup analysis

| Group | Count | Percent | HR | CI_2.5 | CI_97.5 | P_for_Interaction |
| --- | --- | --- | --- | --- | --- | --- |
| Youth and Middle-aged Group | 2889 | 29.891 |  |  |  | 0.220 |
| Middle-aged and elderly group | 3688 | 38.158 | 1.392 | 1.236 | 1.568 |
| Older age-group | 3088 | 31.950 | 1.841 | 1.637 | 2.070 |

Table 4 Results of subgroup analysis of 28-day mortality risk in supportive therapy

| Group | Count | Percent | HR | CI_2.5 | CI_97.5 | P_for_Interaction |
| --- | --- | --- | --- | --- | --- | --- |
| Circulatory support therapy | | | | | | 0.009 |
| No | 2846 | 29.446 |  |  |  |
| Yes | 6819 | 70.554 | 2.244 | 1.993 | 2.526 |
| Respiratory support | | | | | | 0.513 |
| No | 1376 | 14.237 |  |  |  |
| Yes | 8289 | 85.763 | 1.334 | 1.160 | 1.535 |
| Other supportive care | | | | | | <0.001 |
| No | 8648 | 89.477 |  |  |  |
| Yes | 1017 | 10.523 | 3.244 | 2.928 | 3.594 |

Table 5. Results of the 28-day mortality risk comorbidity subgroup analysis

| Group | Count | Percent | HR | CI_2.5 | CI_97.5 | P_for_Interaction |
| --- | --- | --- | --- | --- | --- | --- |
| Hypertension |  |  |  |  |  | 0.457 |
| No | 6305 | 65.235 |  |  |  |
| Yes | 3360 | 34.765 | 0.713 | 0.646 | 0.786 |
| Acute kidney injury |  |  |  |  |  | <0.001 |
| No | 4601 | 47.605 |  |  |  |
| Yes | 5064 | 52.395 | 2.568 | 2.324 | 2.838 |
| Liver cirrhosis |  |  |  |  |  | 0.331 |
| No | 8646 | 89.457 |  |  |  |
| Yes | 1019 | 10.543 | 2.058 | 1.833 | 2.310 |
| Hepatitis |  |  |  |  |  | 0.314 |
| No | 8826 | 91.319 |  |  |  |
| Yes | 839 | 8.681 | 1.374 | 1.193 | 1.581 |
| Stroke |  |  |  |  |  | 0.053 |
| No | 8962 | 92.726 |  |  |  |
| Yes | 703 | 7.274 | 1.119 | 0.951 | 1.317 |
| Chronic kidney disease |  |  |  |  |  | 0.905 |
| No | 7345 | 75.996 |  |  |  |
| Yes | 2320 | 24.004 | 1.328 | 1.206 | 1.462 |
| Type 2 diabetes |  |  |  |  |  | 0.302 |
| No | 6670 | 69.012 |  |  |  |
| Yes | 2995 | 30.988 | 1.094 | 0.996 | 1.201 |
| Type 1 diabetes |  |  |  |  |  | 0.281 |
| No | 9503 | 98.324 |  |  |  |
| Yes | 162 | 1.676 | 0.685 | 0.462 | 1.017 |
| Hyperlipemia |  |  |  |  |  | 0.001 |
| No | 5699 | 58.965 |  |  |  |
| Yes | 3966 | 41.035 | 0.945 | 0.864 | 1.034 |
| Heart-failure |  |  |  |  |  | 0.061 |
| No | 6583 | 68.112 |  |  |  |
| Yes | 3082 | 31.888 | 1.486 | 1.358 | 1.626 |
| Coronary atherosclerotic heart disease |  |  |  |  |  | <0.001 |
| No | 5949 | 61.552 |  |  |  |
| Yes | 3716 | 38.448 | 1.142 | 1.044 | 1.249 |

Table 6 Results of 90-day mortality risk age subgroup analysis

| Group | Count | Percent | HR | CI_2.5 | CI_97.5 | P_for_Interaction |
| --- | --- | --- | --- | --- | --- | --- |
| Youth and Middle-aged Group | 2889 | 29.891 |  |  |  | 0.206 |
| Middle-aged and elderly group | 3688 | 38.158 | 1.355 | 1.215 | 1.512 |
| Older age-group | 3088 | 31.950 | 1.724 | 1.546 | 1.922 |

Table 7 Results of the 90-day mortality risk subgroup analysis of supportive therapy

| Group | Count | Percent | HR | CI_2.5 | CI_97.5 | P_for_Interaction |
| --- | --- | --- | --- | --- | --- | --- |
| Circulatory support therapy | | | | | | <0.001 |
| No | 2846 | 29.446 |  |  |  |
| Yes | 6819 | 70.554 | 2.336 | 2.089 | 2.612 |
| Respiratory support | | | | | | 0.396 |
| No | 1376 | 14.237 |  |  |  |
| Yes | 8289 | 85.763 | 1.323 | 1.162 | 1.508 |
| Other supportive care | | | | | | <0.001 |
| No | 8648 | 89.477 |  |  |  |
| Yes | 1017 | 10.523 | 3.552 | 3.231 | 3.906 |

Table 8. Results of the 90-day mortality risk comorbidity subgroup analysis

| Group | Count | Percent | HR | CI_2.5 | CI_97.5 | P_for_Interaction |
| --- | --- | --- | --- | --- | --- | --- |
| Hypertension |  |  |  |  |  | 0.537 |
| No | 6305 | 65.235 |  |  |  |
| Yes | 3360 | 34.765 | 0.692 | 0.631 | 0.759 |
| Acute kidney injury |  |  |  |  |  | <0.001 |
| No | 4601 | 47.605 |  |  |  |
| Yes | 5064 | 52.395 | 2.646 | 2.410 | 2.906 |
| Liver cirrhosis |  |  |  |  |  | 0.839 |
| No | 8646 | 89.457 |  |  |  |
| Yes | 1019 | 10.543 | 2.110 | 1.893 | 2.351 |
| Hepatitis |  |  |  |  |  | 0.393 |
| No | 8826 | 91.319 |  |  |  |
| Yes | 839 | 8.681 | 1.474 | 1.296 | 1.676 |
| Stroke |  |  |  |  |  | 0.126 |
| No | 8962 | 92.726 |  |  |  |
| Yes | 703 | 7.274 | 1.083 | 0.929 | 1.264 |
| Chronic kidney disease |  |  |  |  |  | 0.634 |
| No | 7345 | 75.996 |  |  |  |
| Yes | 2320 | 24.004 | 1.386 | 1.267 | 1.516 |
| Type 2 diabetes |  |  |  |  |  | 0.171 |
| No | 6670 | 69.012 |  |  |  |
| Yes | 2995 | 30.988 | 1.116 | 1.023 | 1.218 |
| Type 1 diabetes |  |  |  |  |  | 0.627 |
| No | 9503 | 98.324 |  |  |  |
| Yes | 162 | 1.676 | 0.645 | 0.441 | 0.943 |
| Hyperlipemia |  |  |  |  |  | <0.001 |
| No | 5699 | 58.965 |  |  |  |
| Yes | 3966 | 41.035 | 0.911 | 0.837 | 0.991 |
| Heart-failure |  |  |  |  |  | 0.101 |
| No | 6583 | 68.112 |  |  |  |
| Yes | 3082 | 31.888 | 1.484 | 1.364 | 1.615 |
| Coronary atherosclerotic heart disease |  |  |  |  |  | <0.001 |
| No | 5949 | 61.552 |  |  |  |
| Yes | 3716 | 38.448 | 1.123 | 1.033 | 1.221 |

Table 9 Patient baseline data from the external validation set

| Variable |  | Overall（N=2,659） | Q1（N=649） | Q2（N=680） | Q3（N=665） | Q4（N=665） | p-value |
| --- | --- | --- | --- | --- | --- | --- | --- |
| basic document | | | | | | | |
| Age |  | 64.13 (18.00 - 90.00) | 63.24 (18.00 - 90.00) | 64.86 (18.00 - 90.00) | 64.44 (18.00 - 90.00) | 63.92 (19.00 - 90.00) | 0.160 |
| Gender |  |  |  |  |  |  | 0.264 |
|  | female | 1,051.00 (45.42%) | 258.00 (45.26%) | 295.00 (48.68%) | 244.00 (43.26%) | 254.00 (44.25%) |  |
|  | male | 1,263.00 (54.58%) | 312.00 (54.74%) | 311.00 (51.32%) | 320.00 (56.74%) | 320.00 (55.75%) |  |
|  | unspecified | 345 | 79 | 74 | 101 | 91 |  |
| BMI |  | 205.92 (11.78 - 225,000.00) | 30.50 (12.58 - 297.19) | 386.14 (13.74 - 217,301.04) | 30.51 (11.78 - 82.04) | 368.27 (11.94 - 225,000.00) | 0.344 |
| Race |  |  |  |  |  |  | 0.088 |
|  | American | 238(8.95%) | 63(9.70%) | 67(9.85%) | 51(7.67%) | 57(8.57%) |  |
|  | Asian | 51.00 (1.92%) | 13.00 (2.00%) | 12.00 (1.76%) | 15.00 (2.26%) | 11.00 (1.65%) |  |
|  | Caucasian | 1,741.00 (65.48%) | 399.00 (61.48%) | 455.00 (66.91%) | 439.00 (66.01%) | 448.00 (67.37%) |  |
|  | Spanish | 145.00 (5.45%) | 50.00 (7.70%) | 36.00 (5.29%) | 30.00 (4.51%) | 29.00 (4.36%) |  |
|  | Other or unknown | 484(18.20%) | 144(22.19%) | 110(16.18%) | 130(19.55%) | 120(18.04%) |  |
| Rating data | | | | | | | |
| GCS score |  | 11.63 (3.00 - 15.00) | 11.67 (3.00 - 15.00) | 11.56 (3.00 - 15.00) | 11.52 (3.00 - 15.00) | 11.75 (3.00 - 15.00) | 0.672 |
|  | deficiency | 965 | 213 | 246 | 264 | 242 |  |
| SOFA score |  | 7.40 (0.00 - 22.00) | 7.85 (0.00 - 22.00) | 7.34 (0.00 - 18.00) | 7.14 (0.00 - 21.00) | 7.29 (0.00 - 18.00) | 0.016 |
|  | deficiency | 252 | 56 | 58 | 66 | 72 |  |
| APACHE score |  | 80.74 (-1.00 - 205.00) | 81.89 (-1.00 - 205.00) | 78.92 (-1.00 - 167.00) | 80.25 (-1.00 - 174.00) | 81.94 (-1.00 - 173.00) | 0.314 |
|  | deficiency | 576 | 135 | 145 | 157 | 139 |  |
| Basic vital signs | | | | | | | |
| Heart rate （bpm） |  | 99.16 (30.00 - 200.00) | 97.29 (42.00 - 200.00) | 98.93 (32.00 - 169.00) | 99.28 (41.00 - 164.00) | 101.10 (30.00 - 198.00) | 0.003 |
| Temperature（℉） |  | 36.91 (26.50 - 40.60) | 36.87 (31.20 - 40.00) | 36.94 (26.50 - 40.60) | 36.96 (32.60 - 40.50) | 36.86 (28.00 - 40.50) | 0.091 |
| Respiratory rate (breaths/min) |  | 22.46 (0.00 - 57.00) | 22.24 (0.00 - 57.00) | 22.09 (6.00 - 48.00) | 22.51 (9.00 - 48.00) | 23.01 (0.00 - 54.00) | 0.036 |
| Spo2（%） |  | 96.27 (26.00 - 100.00) | 96.47 (27.00 - 100.00) | 96.32 (76.00 - 100.00) | 96.28 (26.00 - 100.00) | 96.01 (57.00 - 100.00) | 0.026 |
| Lab metrics | | | | | | | |
| Lymphocytes (K/μL) |  | 3.55 (0.05 - 154.19) | 3.73 (0.15 - 154.19) | 3.24 (0.05 - 55.81) | 3.39 (0.17 - 61.57) | 3.86 (0.08 - 76.00) | <0.001 |
| RDW（%） |  | 17.55 (11.90 - 37.40) | 17.38 (11.90 - 30.30) | 17.24 (11.90 - 30.20) | 17.43 (12.50 - 37.40) | 18.17 (12.60 - 35.30) | <0.001 |
| Platelets （K/uL） |  | 292.93 (13.00 - 1,161.00) | 170.66 (13.00 - 461.00) | 261.68 (52.00 - 915.00) | 327.00 (43.00 - 892.00) | 410.13 (42.00 - 1,161.00) | <0.001 |
| RBC （m/uL） |  | 3.90 (2.13 - 7.16) | 3.79 (2.13 - 6.31) | 3.92 (2.21 - 6.20) | 3.92 (2.15 - 6.42) | 3.98 (2.32 - 7.16) | <0.001 |
| WBC（K/uL） |  | 21.83 (0.38 - 310.20) | 14.16 (0.38 - 248.69) | 18.09 (5.30 - 98.96) | 22.25 (6.40 - 69.70) | 32.73 (8.46 - 310.20) | <0.001 |
| Monocyte （K/uL） |  | 2.36 (0.00 - 159.13) | 1.24 (0.00 - 36.78) | 1.73 (0.08 - 11.00) | 2.28 (0.17 - 27.14) | 4.16 (0.32 - 159.13) | <0.001 |
| neutrophile （K/uL） |  | 18.20 (-0.03 - 133.12) | 10.62 (-0.03 - 57.49) | 15.17 (4.10 - 57.50) | 18.94 (4.93 - 65.52) | 27.98 (5.66 - 133.12) | <0.001 |
| PLR |  | 144.94 (0.47 - 3,674.54) | 90.28 (0.47 - 678.73) | 124.18 (10.77 - 3,354.30) | 158.03 (2.97 - 1,552.54) | 206.45 (2.03 - 3,674.54) | <0.001 |
| PIV |  | 5,102.52 (-0.55 - 107,694.13) | 692.56 (-0.55 - 1,359.15) | 2,089.53 (1,361.54 - 2,925.32) | 4,195.03 (2,927.55 - 5,852.10) | 13,394.82 (5,852.35 - 107,694.13) | <0.001 |
| aninon gap(mEq/L) |  | 15.31 (2.70 - 58.20) | 15.46 (4.00 - 58.20) | 14.80 (4.00 - 36.00) | 15.25 (2.70 - 47.00) | 15.75 (6.00 - 39.00) | 0.010 |
| calcium ((mg/dL) |  | 8.84 (6.10 - 15.60) | 8.68 (6.10 - 15.60) | 8.88 (6.70 - 14.90) | 8.89 (6.60 - 12.60) | 8.92 (6.60 - 15.40) | <0.001 |
| chlorine(mEq/L) |  | 111.94 (76.00 - 155.00) | 111.57 (90.00 - 145.00) | 112.10 (91.00 - 143.00) | 111.75 (76.00 - 139.00) | 112.32 (85.00 - 155.00) | 0.120 |
| potassium (mEq/L) |  | 4.92 (3.10 - 9.80) | 4.82 (3.10 - 9.30) | 4.89 (3.20 - 9.80) | 4.91 (3.60 - 8.20) | 5.08 (3.50 - 8.90) | <0.001 |
| sodium (mEq/L) |  | 145.32 (123.00 - 178.00) | 145.07 (123.00 - 172.00) | 145.13 (131.00 - 170.00) | 145.28 (124.00 - 173.00) | 145.80 (127.00 - 178.00) | 0.064 |
| Glucose(mg/dL) |  | 231.09 (69.00 - 1,263.00) | 221.43 (70.00 - 1,263.00) | 232.15 (84.00 - 986.00) | 226.61 (75.00 - 1,215.00) | 243.90 (69.00 - 872.00) | <0.001 |
| PT-INR |  | 2.03 (0.85 - 17.10) | 2.00 (0.88 - 17.10) | 1.92 (0.85 - 11.20) | 2.02 (0.90 - 10.85) | 2.19 (0.90 - 12.50) | <0.001 |
| PT(sec) |  | 22.20 (9.40 - 119.50) | 21.89 (9.70 - 115.00) | 21.27 (9.40 - 109.40) | 22.12 (9.40 - 119.50) | 23.51 (9.60 - 115.70) | 0.004 |
| PTT(sec) |  | 54.10 (19.40 - 324.50) | 50.76 (19.40 - 233.80) | 51.64 (20.00 - 282.00) | 54.83 (20.00 - 220.50) | 59.15 (20.50 - 324.50) | 0.003 |
| creatinine (mg/dL) |  | 2.78 (0.13 - 30.58) | 2.66 (0.13 - 30.58) | 2.71 (0.29 - 15.82) | 2.77 (0.39 - 23.60) | 2.97 (0.32 - 14.10) | 0.002 |
| BUN(mg/dL) |  | 55.71 (3.00 - 390.00) | 50.02 (4.00 - 390.00) | 53.21 (3.00 - 186.00) | 55.28 (5.00 - 289.00) | 64.25 (6.00 - 218.00) | <0.001 |
| lactate(mmol/L) |  | 3.87 (0.30 - 34.20) | 4.43 (0.40 - 34.20) | 3.46 (0.30 - 27.90) | 3.80 (0.40 - 32.40) | 3.82 (0.40 - 22.20) | <0.001 |
| Po2(mmHg) |  | 176.34 (27.00 - 621.00) | 163.68 (27.00 - 601.00) | 176.86 (29.00 - 596.00) | 178.09 (32.00 - 555.00) | 186.40 (36.00 - 621.00) | <0.001 |
| Ph |  | 7.44 (6.98 - 9.00) | 7.42 (7.00 - 7.72) | 7.44 (6.98 - 7.75) | 7.45 (7.06 - 7.73) | 7.46 (7.01 - 9.00) | <0.001 |
| Pco2(mmHg) |  | 48.60 (15.00 - 168.00) | 46.50 (19.40 - 155.90) | 48.24 (17.90 - 144.10) | 47.99 (18.90 - 121.00) | 51.62 (15.00 - 168.00) | <0.001 |
| Supporting treatment | | | | | | | |
| Mechanical ventilation |  |  |  |  |  |  | 0.002 |
|  | Yes | 1,278.00 (48.06%) | 277.00(42.68%) | 331.00 (48.68%) | 315.00(47.37%) | 355.00(53.38%) |  |
|  | No | 1,381.00 (51.94%) | 372.00 (57.32%) | 349.00 (51.32%) | 350.00 (52.63%) | 310.00 (46.62%) |  |
| Mechanical ventilation time |  |  |  |  |  |  |  |
|  | Yes | 410.44 (0.00 - 36,093.00) | 303.90 (0.00 - 31,611.00) | 409.41 (0.00 - 28,789.00) | 319.24 (0.00 - 23,173.00) | 606.68 (0.00 - 36,093.00) | <0.001 |
|  | No | 1,381.00 (51.94%) | 372.00 (57.32%) | 349.00 (51.32%) | 350.00 (52.63%) | 310.00 (46.62%) |  |
| Complication | | | | | | | |
| Hypertension |  |  |  |  |  |  | 0.602 |
|  | Yes | 317.00 (100.00%) | 57.00 (100.00%) | 83.00 (100.00%) | 75.00 (100.00%) | 102.00 (100.00%) |  |
|  | No | 2,342 | 592 | 597 | 590 | 563 |  |
| Acute renal failure |  |  |  |  |  |  | <0.001 |
|  | Yes | 933.00 (100.00%) | 224.00 (100.00%) | 236.00 (100.00%) | 217.00 (100.00%) | 256.00 (100.00%) |  |
|  | No | 1,726 | 425 | 444 | 448 | 409 |  |
| Liver cirrhosis |  |  |  |  |  |  | 0.009 |
|  | Yes | 43.00 (100.00%) | 16.00 (100.00%) | 12.00 (100.00%) | 9.00 (100.00%) | 6.00 (100.00%) |  |
|  | No | 2,616 | 633 | 668 | 656 | 659 |  |
| Hepatitis |  |  |  |  |  |  | 0.260 |
|  | Yes | 1.00 (100.00%) | 1.00 (100.00%) | 0.00 (NA%) | 0.00 (NA%) | 0.00 (NA%) |  |
|  | No | 2,658 | 648 | 680 | 665 | 665 |  |
| Stroke |  |  |  |  |  |  | 0.804 |
|  | Yes | 38.00 (100.00%) | 13.00 (100.00%) | 8.00 (100.00%) | 6.00 (100.00%) | 11.00 (100.00%) |  |
|  | No | 2,621 | 636 | 672 | 659 | 654 |  |
| Chronic kidney disease |  |  |  |  |  |  | 0.107 |
|  | Yes | 189.00 (100.00%) | 47.00 (100.00%) | 57.00 (100.00%) | 40.00 (100.00%) | 45.00 (100.00%) |  |
|  | No | 2,470 | 602 | 623 | 625 | 620 |  |
| Type 2 diabetes |  |  |  |  |  |  | 0.414 |
|  | Yes | 46.00 (100.00%) | 14.00 (100.00%) | 11.00 (100.00%) | 10.00 (100.00%) | 11.00 (100.00%) |  |
|  | No | 2,613 | 635 | 669 | 655 | 654 |  |
| Type 1 diabetes |  |  |  |  |  |  | 0.878 |
|  | Yes | 7.00 (100.00%) | 1.00 (100.00%) | 2.00 (100.00%) | 2.00 (100.00%) | 2.00 (100.00%) |  |
|  | No | 2,652 | 648 | 678 | 663 | 663 |  |
| Hyperlipemia |  |  |  |  |  |  | 0.602 |
|  | Yes | 75.00 (100.00%) | 18.00 (100.00%) | 24.00 (100.00%) | 15.00 (100.00%) | 18.00 (100.00%) |  |
|  | No | 2,584 | 631 | 656 | 650 | 647 |  |
| Heart-failure |  |  |  |  |  |  | <0.001 |
|  | Yes | 2,087.00 (100.00%) | 508.00 (100.00%) | 553.00 (100.00%) | 502.00 (100.00%) | 524.00 (100.00%) |  |
|  | No | 572 | 141 | 127 | 163 | 141 |  |
| Coronary atherosclerotic heart disease |  |  |  |  |  |  | <0.001 |
|  | Yes | 294.00 (100.00%) | 59.00 (100.00%) | 81.00 (100.00%) | 80.00 (100.00%) | 74.00 (100.00%) |  |
|  | No | 2,365 | 590 | 599 | 585 | 591 |  |
| Ending | | | | | | |  |
| 28-day mortality |  | 627.00 (23.58%) | 180.00 (27.73%) | 128.00 (18.82%) | 154.00 (23.16%) | 165.00 (24.81%) | 0.002 |
| 90-day mortality |  | 683.00 (25.69%) | 188.00 (28.97%) | 142.00 (20.88%) | 167.00 (25.11%) | 186.00 (27.97%) | 0.003 |

Table 10 28-day mortality risk machine learning model parameters

| model | dataset | sensitivity | specificity | ppv | npv | accuracy | f1 | precision | recall | optimal_threshold |
| --- | --- | --- | --- | --- | --- | --- | --- | --- | --- | --- |
| rb | training set | 0.680(0.669-0.691) | 0.760(0.750-0.770) | 0.423(0.411-0.435) | 0.902(0.895-0.909) | 0.743(0.733-0.754) | 0.521(0.510-0.533) | 0.423(0.411-0.435) | 0.680(0.669-0.691) | 0.239 |
| rb | test set | 0.619(0.601-0.637) | 0.734(0.718-0.750) | 0.376(0.358-0.393) | 0.882(0.870-0.893) | 0.710(0.694-0.727) | 0.468(0.450-0.486) | 0.376(0.358-0.393) | 0.619(0.601-0.637) | 0.239 |
| rb | External validation set | 0.785(0.770-0.799) | 0.480(0.462-0.498) | 0.310(0.293-0.327) | 0.882(0.870-0.894) | 0.550(0.532-0.568) | 0.444(0.426-0.462) | 0.310(0.293-0.327) | 0.785(0.770-0.799) | 0.239 |
| lr | training set | 0.774(0.764-0.784) | 0.549(0.537-0.560) | 0.307(0.296-0.318) | 0.904(0.897-0.911) | 0.595(0.583-0.607) | 0.440(0.428-0.452) | 0.307(0.296-0.318) | 0.774(0.764-0.784) | 0.186 |
| lr | test set | 0.770(0.755-0.785) | 0.534(0.516-0.552) | 0.299(0.283-0.316) | 0.900(0.889-0.911) | 0.582(0.564-0.600) | 0.431(0.413-0.449) | 0.299(0.283-0.316) | 0.770(0.755-0.785) | 0.186 |
| lr | External validation set | 0.715(0.699-0.732) | 0.471(0.453-0.489) | 0.287(0.271-0.303) | 0.848(0.835-0.861) | 0.527(0.509-0.545) | 0.410(0.392-0.428) | 0.287(0.271-0.303) | 0.715(0.699-0.732) | 0.186 |
| gbc | training set | 0.729(0.718-0.740) | 0.767(0.757-0.777) | 0.447(0.435-0.459) | 0.916(0.910-0.923) | 0.759(0.749-0.769) | 0.554(0.543-0.566) | 0.447(0.435-0.459) | 0.729(0.718-0.740) | 0.232 |
| gbc | test set | 0.612(0.595-0.630) | 0.730(0.714-0.746) | 0.370(0.352-0.387) | 0.879(0.867-0.891) | 0.706(0.689-0.722) | 0.461(0.443-0.479) | 0.370(0.352-0.387) | 0.612(0.595-0.630) | 0.232 |
| gbc | External validation set | 0.751(0.735-0.766) | 0.554(0.536-0.572) | 0.334(0.317-0.351) | 0.882(0.870-0.894) | 0.599(0.582-0.617) | 0.462(0.444-0.480) | 0.334(0.317-0.351) | 0.751(0.735-0.766) | 0.232 |
| abc | training set | 0.689(0.678-0.700) | 0.672(0.661-0.683) | 0.352(0.341-0.364) | 0.893(0.886-0.901) | 0.676(0.664-0.687) | 0.466(0.454-0.478) | 0.352(0.341-0.364) | 0.689(0.678-0.700) | 0.466 |
| abc | test set | 0.701(0.685-0.718) | 0.660(0.642-0.677) | 0.348(0.330-0.365) | 0.895(0.884-0.906) | 0.668(0.651-0.685) | 0.465(0.447-0.483) | 0.348(0.330-0.365) | 0.701(0.685-0.718) | 0.466 |
| abc | External validation set | 0.708(0.692-0.724) | 0.467(0.449-0.485) | 0.283(0.267-0.300) | 0.843(0.830-0.856) | 0.522(0.504-0.540) | 0.405(0.387-0.422) | 0.283(0.267-0.300) | 0.708(0.692-0.724) | 0.466 |
| xgb | training set | 0.712(0.701-0.723) | 0.712(0.701-0.723) | 0.390(0.379-0.402) | 0.905(0.898-0.912) | 0.712(0.701-0.723) | 0.504(0.492-0.516) | 0.390(0.379-0.402) | 0.712(0.701-0.723) | 0.223 |
| xgb | test set | 0.671(0.654-0.688) | 0.703(0.686-0.720) | 0.369(0.351-0.387) | 0.892(0.881-0.903) | 0.697(0.680-0.713) | 0.476(0.458-0.494) | 0.369(0.351-0.387) | 0.671(0.654-0.688) | 0.223 |
| xgb | External validation set | 0.760(0.744-0.775) | 0.500(0.482-0.518) | 0.311(0.295-0.328) | 0.875(0.863-0.887) | 0.559(0.541-0.577) | 0.442(0.424-0.460) | 0.311(0.295-0.328) | 0.760(0.744-0.775) | 0.223 |
| lgb | training set | 0.672(0.661-0.683) | 0.810(0.801-0.820) | 0.478(0.466-0.490) | 0.905(0.898-0.912) | 0.782(0.772-0.792) | 0.559(0.547-0.571) | 0.478(0.466-0.490) | 0.672(0.661-0.683) | 0.264 |
| lgb | test set | 0.557(0.539-0.575) | 0.776(0.760-0.791) | 0.391(0.373-0.409) | 0.871(0.859-0.883) | 0.731(0.715-0.747) | 0.460(0.441-0.478) | 0.391(0.373-0.409) | 0.557(0.539-0.575) | 0.264 |
| lgb | External validation set | 0.653(0.636-0.671) | 0.643(0.626-0.660) | 0.353(0.335-0.370) | 0.862(0.849-0.874) | 0.645(0.628-0.663) | 0.458(0.440-0.476) | 0.353(0.335-0.370) | 0.653(0.636-0.671) | 0.264 |

Table 11: Parameters of the 90-day mortality risk machine learning model

| model | dataset | sensitivity | specificity | ppv | npv | accuracy | f1 | precision | recall | optimal_threshold |
| --- | --- | --- | --- | --- | --- | --- | --- | --- | --- | --- |
| rb | training set | 0.728(0.717-0.738) | 0.702(0.691-0.712) | 0.387(0.375-0.398) | 0.909(0.902-0.916) | 0.707(0.696-0.718) | 0.505(0.493-0.517) | 0.387(0.375-0.398) | 0.728(0.717-0.738) | 0.221 |
| rb | test set | 0.698(0.681-0.715) | 0.675(0.658-0.692) | 0.357(0.340-0.375) | 0.896(0.885-0.907) | 0.680(0.663-0.697) | 0.473(0.455-0.491) | 0.357(0.340-0.375) | 0.698(0.681-0.715) | 0.221 |
| rb | External validation set | 0.812(0.798-0.826) | 0.416(0.398-0.434) | 0.318(0.301-0.334) | 0.869(0.857-0.881) | 0.515(0.497-0.533) | 0.457(0.439-0.475) | 0.318(0.301-0.334) | 0.812(0.798-0.826) | 0.221 |
| lr | training set | 0.774(0.764-0.784) | 0.549(0.537-0.560) | 0.307(0.296-0.318) | 0.904(0.897-0.911) | 0.595(0.583-0.607) | 0.440(0.428-0.452) | 0.307(0.296-0.318) | 0.774(0.764-0.784) | 0.186 |
| lr | test set | 0.770(0.755-0.785) | 0.534(0.516-0.552) | 0.299(0.283-0.316) | 0.900(0.889-0.911) | 0.582(0.564-0.600) | 0.431(0.413-0.449) | 0.299(0.283-0.316) | 0.770(0.755-0.785) | 0.186 |
| lr | External validation set | 0.715(0.699-0.732) | 0.477(0.459-0.495) | 0.314(0.297-0.331) | 0.833(0.820-0.847) | 0.536(0.518-0.554) | 0.436(0.418-0.454) | 0.314(0.297-0.331) | 0.715(0.699-0.732) | 0.186 |
| gbc | training set | 0.722(0.711-0.732) | 0.774(0.764-0.784) | 0.453(0.441-0.465) | 0.915(0.908-0.922) | 0.763(0.753-0.773) | 0.556(0.545-0.568) | 0.453(0.441-0.465) | 0.722(0.711-0.732) | 0.234 |
| gbc | test set | 0.631(0.613-0.648) | 0.734(0.718-0.750) | 0.380(0.363-0.398) | 0.885(0.873-0.896) | 0.713(0.696-0.729) | 0.474(0.456-0.493) | 0.380(0.363-0.398) | 0.631(0.613-0.648) | 0.234 |
| gbc | External validation set | 0.710(0.693-0.726) | 0.589(0.571-0.607) | 0.366(0.349-0.384) | 0.858(0.846-0.871) | 0.619(0.602-0.637) | 0.483(0.465-0.501) | 0.366(0.349-0.384) | 0.710(0.693-0.726) | 0.234 |
| abc | training set | 0.689(0.678-0.700) | 0.672(0.661-0.683) | 0.352(0.341-0.364) | 0.893(0.886-0.901) | 0.676(0.664-0.687) | 0.466(0.454-0.478) | 0.352(0.341-0.364) | 0.689(0.678-0.700) | 0.466 |
| abc | test set | 0.701(0.685-0.718) | 0.660(0.642-0.677) | 0.348(0.330-0.365) | 0.895(0.884-0.906) | 0.668(0.651-0.685) | 0.465(0.447-0.483) | 0.348(0.330-0.365) | 0.701(0.685-0.718) | 0.466 |
| abc | External validation set | 0.700(0.684-0.717) | 0.469(0.451-0.487) | 0.306(0.290-0.323) | 0.824(0.810-0.838) | 0.527(0.509-0.545) | 0.426(0.408-0.444) | 0.306(0.290-0.323) | 0.700(0.684-0.717) | 0.466 |
| xgb | training set | 0.733(0.723-0.744) | 0.752(0.741-0.762) | 0.433(0.421-0.445) | 0.916(0.909-0.922) | 0.748(0.737-0.758) | 0.545(0.533-0.556) | 0.433(0.421-0.445) | 0.733(0.723-0.744) | 0.235 |
| xgb | test set | 0.639(0.622-0.657) | 0.724(0.708-0.741) | 0.375(0.357-0.393) | 0.886(0.874-0.897) | 0.707(0.690-0.723) | 0.473(0.455-0.491) | 0.375(0.357-0.393) | 0.639(0.622-0.657) | 0.235 |
| xgb | External validation set | 0.721(0.704-0.737) | 0.566(0.549-0.584) | 0.357(0.340-0.375) | 0.858(0.846-0.871) | 0.605(0.587-0.623) | 0.478(0.460-0.496) | 0.357(0.340-0.375) | 0.721(0.704-0.737) | 0.235 |
| lgb | training set | 0.672(0.661-0.683) | 0.810(0.801-0.820) | 0.478(0.466-0.490) | 0.905(0.898-0.912) | 0.782(0.772-0.792) | 0.559(0.547-0.571) | 0.478(0.466-0.490) | 0.672(0.661-0.683) | 0.264 |
| lgb | test set | 0.557(0.539-0.575) | 0.776(0.760-0.791) | 0.391(0.373-0.409) | 0.871(0.859-0.883) | 0.731(0.715-0.747) | 0.460(0.441-0.478) | 0.391(0.373-0.409) | 0.557(0.539-0.575) | 0.264 |
| lgb | External validation set | 0.638(0.621-0.656) | 0.646(0.629-0.664) | 0.377(0.359-0.394) | 0.842(0.829-0.855) | 0.644(0.627-0.662) | 0.474(0.456-0.492) | 0.377(0.359-0.394) | 0.638(0.621-0.656) | 0.264 |

Table 12: Parameters of the GBTM Trajectory Model

| Model fit metrics | | | | | |
| --- | --- | --- | --- | --- | --- |
| Track group count | aic | bic | caic | ssbic | hqic |
| 1 | 158680.3 | 158708.3 | 158712.3 | 158695.6 | 158689.9 |
| 2 | 144941.1 | 145011.1 | 145021.1 | 144979.4 | 144965.0 |
| 3 | 143992.6 | 144104.7 | 144120.7 | 144053.9 | 144030.9 |
| 4 | 143672.4 | 143826.6 | 143848.6 | 143756.7 | 143725.1 |
| 5 | 143407.1 | 143589.4 | 143615.4 | 143506.7 | 143469.4 |
| Posterior probability of trajectory distribution | | | | | |
|  | 1 | V2 | V3 | V4 | V5 |
| traj_Avepp1 | 1.0000000 | NA | NA | NA | NA |
| traj_Avepp2 | 0.9943746 | 0.9811333 | NA | NA | NA |
| traj_Avepp3 | 0.9868682 | 0.9885490 | 0.9862536 | NA | NA |
| traj_Avepp4 | 0.9794197 | 0.9790866 | 0.9858119 | 0.9977488 | NA |
| traj_Avepp5 | 0.9932045 | 0.9731313 | 0.9891093 | 0.9812196 | 0.9791859 |
| Trajectory ratio for each group | | | | | |
|  | 1 | V2 | V3 | V4 | V5 |
| traj_num1 | 1.00000000 | NA | NA | NA | NA |
| traj_num2 | 0.73202055 | 0.2679795 | NA | NA | NA |
| traj_num3 | 0.50000000 | 0.1575342 | 0.3424658 | NA | NA |
| traj_num4 | 0.35787671 | 0.3912671 | 0.1267123 | 0.1241438 | NA |
| traj_num5 | 0.08390411 | 0.3184932 | 0.1155822 | 0.3253425 | 0.1566781 |
| Average trajectory pattern analysis | | | | | |
|  | 1 | V2 | V3 | V4 | V5 |
| traj_OCC1 | NaN | NA | NA | NA | NA |
| traj_OCC2 | 64.39209 | 142.75712 | NA | NA | NA |
| traj_OCC3 | 75.17349 | 456.01768 | 138.7159 | NA | NA |
| traj_OCC4 | 86.18313 | 72.61321 | 472.6931 | 3128.3158 | NA |
| traj_OCC5 | 1600.72502 | 78.18697 | 687.2922 | 107.1685 | 255.8922 |

Table 13 Baseline characteristics of patients

| Variable | Levels | Overall（N = 1,168） | Traj-1（N = 418） | Traj-2（N = 457） | Traj-3（N = 148） | Traj-4（N = 145） | p-value |
| --- | --- | --- | --- | --- | --- | --- | --- |
| Basic document | | | | | | | |
| Age |  | 63.22 (19.00 - 99.00) | 62.26 (19.00 - 93.00) | 62.47 (19.00 - 92.00) | 64.34 (25.00 - 99.00) | 67.22 (24.00 - 96.00) | 0.008 |
| Gender |  |  |  |  |  |  | 0.134 |
|  | female | 513.00 (43.92%) | 180.00 (43.06%) | 218.00 (47.70%) | 60.00 (40.54%) | 55.00 (37.93%) |  |
|  | male | 655.00 (56.08%) | 238.00 (56.94%) | 239.00 (52.30%) | 88.00 (59.46%) | 90.00 (62.07%) |  |
| Race |  |  |  |  |  |  | 0.042 |
|  | white | 672.00 (57.53%) | 229.00 (54.78%) | 250.00 (54.70%) | 92.00 (62.16%) | 101.00 (69.66%) |  |
|  | Asian | 41.00 (3.51%) | 19.00 (4.55%) | 11.00 (2.41%) | 5.00 (3.38%) | 6.00 (4.14%) |  |
|  | Melanoderm | 133.00 (11.39%) | 54.00 (12.92%) | 55.00 (12.04%) | 13.00 (8.78%) | 11.00 (7.59%) |  |
|  | Spanish | 52.00 (4.45%) | 16.00 (3.83%) | 22.00 (4.81%) | 10.00 (6.76%) | 4.00 (2.76%) |  |
|  | Other | 270.00 (23.12%) | 100.00 (23.92%) | 119.00 (26.04%) | 28.00 (18.92%) | 23.00 (15.86%) |  |
| 评分 | | | | | | | |
| SOFA score |  | 7.67 (2.00 - 21.00) | 7.73 (2.00 - 21.00) | 7.49 (2.00 - 20.00) | 7.64 (2.00 - 16.00) | 8.11 (2.00 - 18.00) | 0.480 |
| APSIII score |  | 57.71 (10.00 - 184.00) | 55.90 (10.00 - 184.00) | 57.81 (12.00 - 139.00) | 62.79 (23.00 - 130.00) | 57.46 (17.00 - 130.00) | 0.003 |
| SAPSII score |  | 43.27 (6.00 - 104.00) | 41.74 (6.00 - 104.00) | 42.56 (13.00 - 88.00) | 46.14 (10.00 - 82.00) | 47.01 (13.00 - 90.00) | <0.001 |
| OASIS score |  | 35.28 (10.00 - 61.00) | 34.83 (10.00 - 61.00) | 35.49 (15.00 - 59.00) | 37.89 (18.00 - 59.00) | 33.29 (14.00 - 52.00) | <0.001 |
| GCS score |  | 13.37 (3.00 - 15.00) | 13.19 (3.00 - 15.00) | 13.39 (3.00 - 15.00) | 13.52 (3.00 - 15.00) | 13.66 (3.00 - 15.00) | 0.503 |
| Charlson score |  | 5.22 (0.00 - 17.00) | 5.00 (0.00 - 17.00) | 5.10 (0.00 - 17.00) | 5.40 (0.00 - 14.00) | 6.04 (1.00 - 13.00) | <0.001 |
| ShockIndex score |  | 1.89 (0.28 - 532.47) | 2.76 (0.49 - 532.47) | 1.40 (0.44 - 4.97) | 1.52 (0.62 - 5.00) | 1.32 (0.28 - 8.73) | <0.001 |
| Basic vital signs | | | | | | | |
| Heart rate （bpm） |  | 97.01 (0.00 - 175.00) | 96.68 (35.00 - 173.00) | 95.46 (46.00 - 166.00) | 101.20 (47.00 - 175.00) | 98.58 (0.00 - 157.00) | 0.025 |
| Temperature（℉） |  | 98.47 (35.10 - 103.70) | 98.25 (36.70 - 103.70) | 98.51 (35.10 - 103.30) | 98.79 (93.00 - 103.40) | 98.68 (95.50 - 102.10) | 0.340 |
| Respiratory rate (breaths/min) |  | 22.16 (0.00 - 64.00) | 21.74 (7.00 - 64.00) | 22.43 (0.00 - 63.00) | 22.61 (8.00 - 42.00) | 22.10 (7.00 - 52.00) | 0.169 |
| Spo2（%） |  | 95.84 (55.00 - 100.00) | 96.07 (61.00 - 100.00) | 95.67 (73.00 - 100.00) | 95.18 (55.00 - 100.00) | 96.38 (79.00 - 100.00) | 0.095 |
| Lab metrics | | | | | | | |
| Anion gap(mEq/L) |  | 15.50 (3.00 - 47.00) | 15.36 (5.00 - 36.00) | 15.60 (3.00 - 47.00) | 16.34 (6.00 - 34.00) | 14.73 (3.00 - 41.00) | 0.004 |
| Calcium (mg/dL) |  | 8.16 (1.70 - 14.50) | 8.17 (5.20 - 12.50) | 8.18 (1.70 - 11.40) | 8.21 (6.00 - 10.70) | 8.00 (5.50 - 14.50) | 0.005 |
| Chlorine(mEq/L) |  | 101.83 (67.00 - 139.00) | 102.50 (67.00 - 127.00) | 101.14 (69.00 - 139.00) | 100.51 (83.00 - 115.00) | 103.38 (85.00 - 135.00) | <0.001 |
| Glucose(mg/dL) |  | 162.64 (23.00 - 1,456.00) | 156.00 (23.00 - 538.00) | 167.33 (27.00 - 1,456.00) | 170.44 (59.00 - 993.00) | 159.00 (64.00 - 765.00) | 0.183 |
| Potassium(mEq/L) |  | 4.28 (2.30 - 9.70) | 4.23 (2.50 - 9.70) | 4.35 (2.30 - 8.90) | 4.44 (2.40 - 9.30) | 4.07 (2.30 - 7.60) | <0.001 |
| Sodium(mEq/L) |  | 137.75 (103.00 - 165.00) | 138.36 (103.00 - 165.00) | 137.25 (106.00 - 155.00) | 137.18 (124.00 - 157.00) | 138.16 (121.00 - 162.00) | 0.031 |
| PT-INR |  | 1.54 (0.90 - 9.60) | 1.54 (0.90 - 7.70) | 1.50 (0.90 - 5.70) | 1.59 (0.90 - 9.40) | 1.63 (0.90 - 9.60) | 0.010 |
| PT(sec) |  | 17.03 (9.40 - 150.00) | 17.14 (9.80 - 150.00) | 16.65 (9.40 - 150.00) | 17.36 (10.20 - 104.20) | 17.61 (9.60 - 102.40) | 0.022 |
| PTT(sec) |  | 37.92 (17.80 - 150.00) | 37.38 (18.40 - 150.00) | 39.62 (17.80 - 150.00) | 38.20 (21.80 - 150.00) | 33.85 (20.30 - 150.00) | 0.033 |
| creatinine (mg/dL) |  | 1.84 (0.20 - 15.70) | 1.70 (0.30 - 14.70) | 2.02 (0.30 - 15.70) | 2.20 (0.30 - 12.80) | 1.32 (0.20 - 7.50) | <0.001 |
| lactate(mmol/L) |  | 2.58 (0.40 - 22.00) | 2.71 (0.40 - 22.00) | 2.50 (0.50 - 16.80) | 2.41 (0.50 - 16.00) | 2.69 (0.60 - 13.90) | 0.566 |
| Pco2(mmHg) |  | 44.20 (14.00 - 121.00) | 43.50 (14.00 - 106.00) | 44.80 (19.00 - 121.00) | 46.93 (21.00 - 94.00) | 41.52 (21.00 - 85.00) | <0.001 |
| Ph |  | 7.34 (6.88 - 7.60) | 7.34 (6.88 - 7.59) | 7.34 (7.03 - 7.58) | 7.32 (6.92 - 7.55) | 7.36 (6.92 - 7.60) | <0.001 |
| Po2(mmHg) |  | 84.76 (15.00 - 542.00) | 87.95 (15.00 - 542.00) | 83.23 (18.00 - 525.00) | 87.90 (20.00 - 420.00) | 77.21 (17.00 - 447.00) | <0.001 |
| Ending | | | | | | | |
| Acute respiratory distress syndrome；ADRS |  |  |  |  |  |  | <0.001 |
|  | No | 1,014.00 (86.82%) | 373.00 (89.23%) | 378.00 (82.71%) | 122.00 (82.43%) | 141.00 (97.24%) |  |
|  | Yes | 154.00 (13.18%) | 45.00 (10.77%) | 79.00 (17.29%) | 26.00 (17.57%) | 4.00 (2.76%) |  |
| Acute kidney injury |  |  |  |  |  |  | <0.001 |
|  | No | 446.00 (38.18%) | 183.00 (43.78%) | 155.00 (33.92%) | 42.00 (28.38%) | 66.00 (45.52%) |  |
|  | Yes | 722.00 (61.82%) | 235.00 (56.22%) | 302.00 (66.08%) | 106.00 (71.62%) | 79.00 (54.48%) |  |

Table 14: Association between PIV trajectories and risk of ARDS in patients with sepsis: multivariable logistic regression results

| Variable Name | Estimate | Std_Error | Z_value | P-value | CI_2.5 | CI_97.5 | OR | Lower_OR | Upper_OR |
| --- | --- | --- | --- | --- | --- | --- | --- | --- | --- |
| Traj-1(Intercept) | -2.115 | 0.158 | -13.402 | 0.000 | -2.438 | -1.817 | 0.121 | 0.087 | 0.162 |
| Traj-2 | 0.549 | 0.201 | 2.740 | 0.006 | 0.161 | 0.949 | 1.732 | 1.175 | 2.582 |
| Traj-3 | 0.569 | 0.268 | 2.127 | 0.033 | 0.034 | 1.087 | 1.766 | 1.035 | 2.965 |
| Traj-4 | -1.448 | 0.531 | -2.726 | 0.006 | -2.661 | -0.523 | 0.235 | 0.070 | 0.592 |

Table 15: Association between PIV trajectories and incident AKI among patients with sepsis: COX Regression Statistical Results.

| Characteristics | Number(%) | Hazard Ratio(HR) | lower_95 | upper_95 | P-value |
| --- | --- | --- | --- | --- | --- |
| Traj-1 | 418 (35.8) |  |  |  |  |
| Traj-2 | 457 (39.1) | 1.292 | 1.090 | 1.533 | 0.003 |
| Traj-3 | 148 (12.7) | 1.506 | 1.197 | 1.894 | 0.000 |
| Traj-4 | 145 (12.4) | 0.878 | 0.680 | 1.133 | 0.317 |
| ID | coef | exp_coef | se_coef | Z | P-value |
| Traj-2 | 0.257 | 1.292 | 0.087 | 2.948 | 0.003 |
| Traj-3 | 0.409 | 1.506 | 0.117 | 3.496 | 0.000 |
| Traj-4 | -0.130 | 0.878 | 0.130 | -1.001 | 0.317 |
